# Supplementary material for: CREB regulates the expression of type 1 inositol 1,4,5-trisphosphate receptors
Source: Oxford University Press journal article supplement (doi:10.1242/jcs.258875), 2021-09-17
Supplement: jcs258875supp.pdf [file jcs258875supp.pdf]

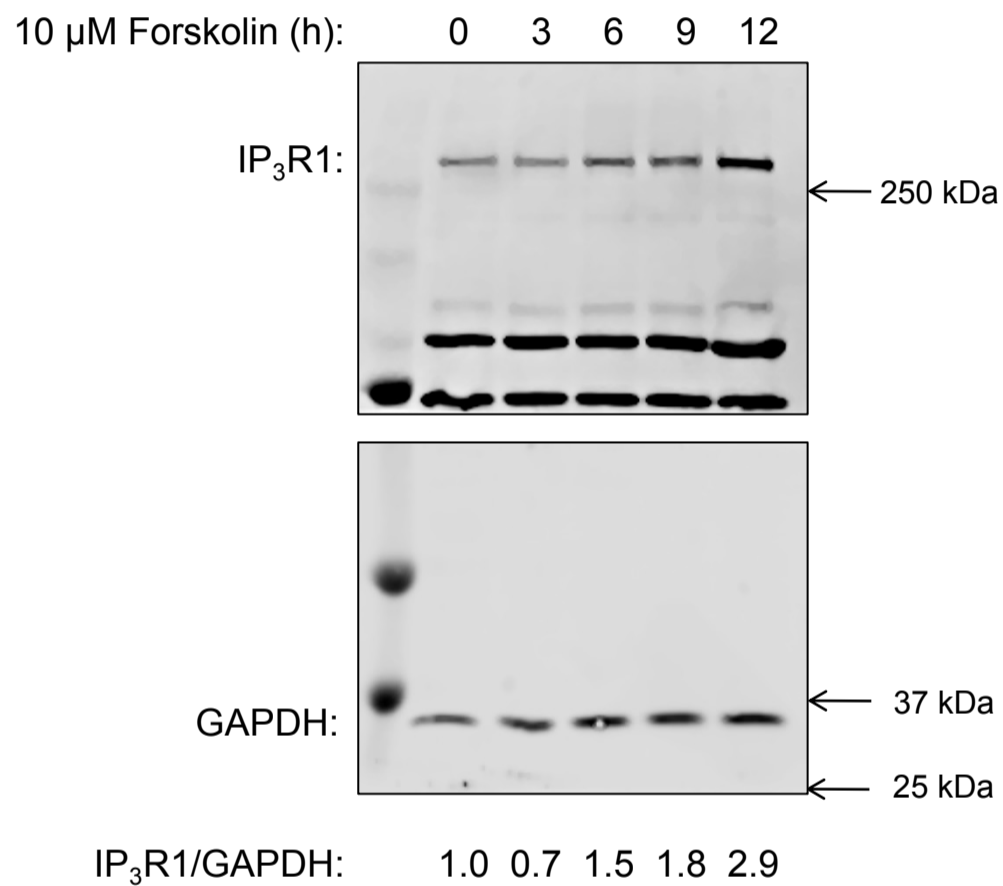

**Fig. S1. Forskolin-induced endogenous IP<sub>3</sub>R1 levels in a time-dependent manner.** HEK-293 cells were treated with 10 μM forskolin for different time points (0, 3, 6, 9, 12 h). Western blotting revealed a time-dependent increase in the endogenous IP<sub>3</sub>R1 protein levels upon forskolin treatment.

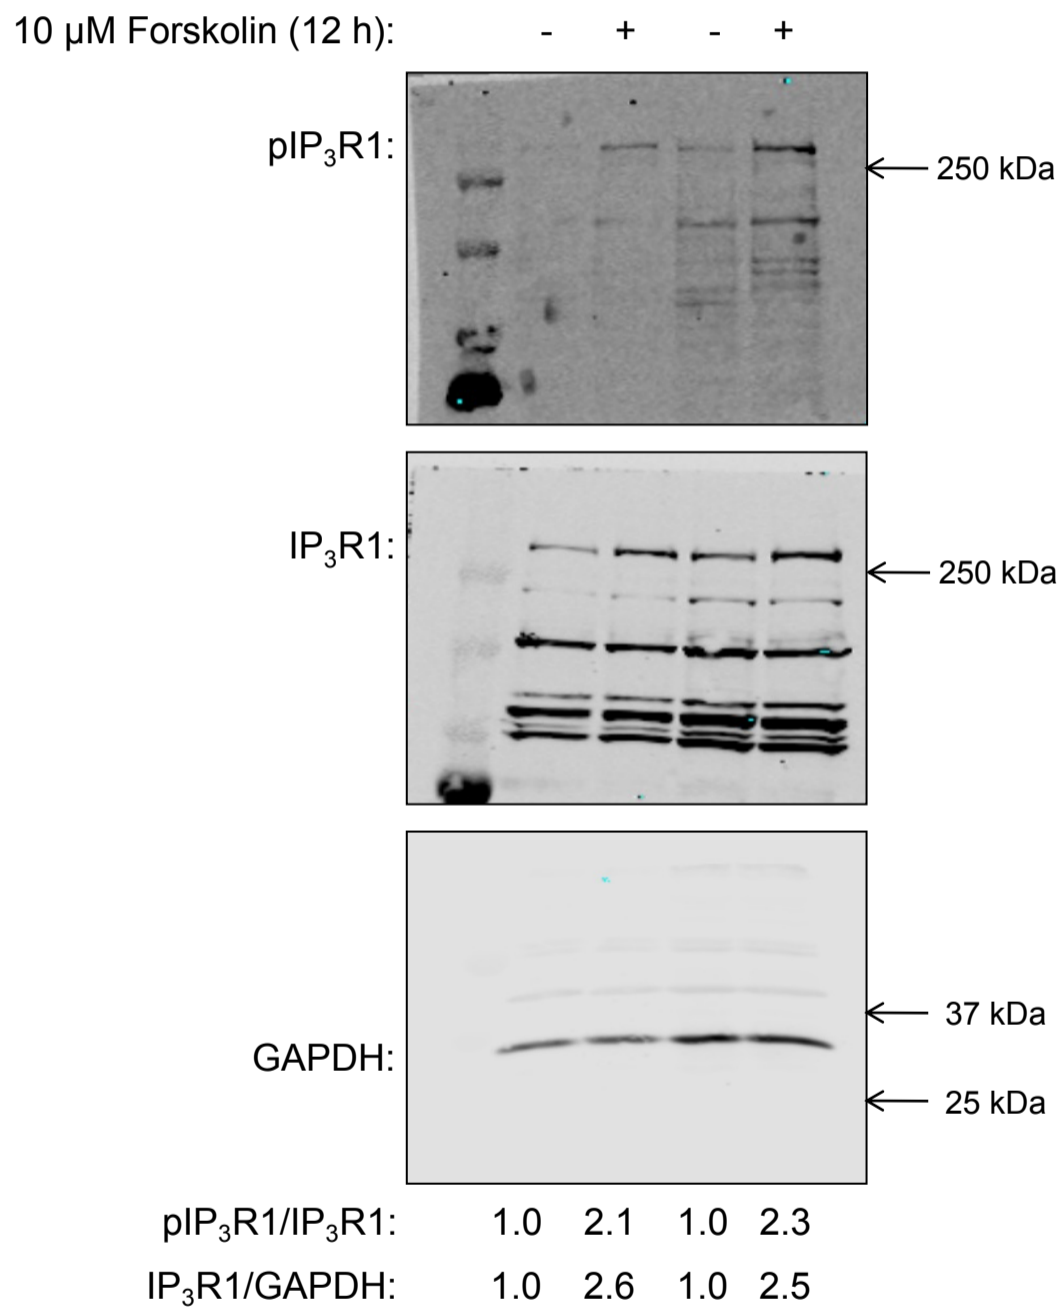

**Fig. S2. Forskolin-induced phosphorylation of IP<sub>3</sub>R1.** HEK-293 cells were treated with 10  $\mu$ M forskolin for 12 hours. Western blots depicting increase in the phosphorylation of the endogenous IP<sub>3</sub>R1 at the Ser-1756 residue and total IP<sub>3</sub>R1 protein levels upon treatment with forskolin. (Lane numbers 1 & 2: 20  $\mu$ g protein and lane numbers 3 & 4: 30  $\mu$ g protein was loaded).

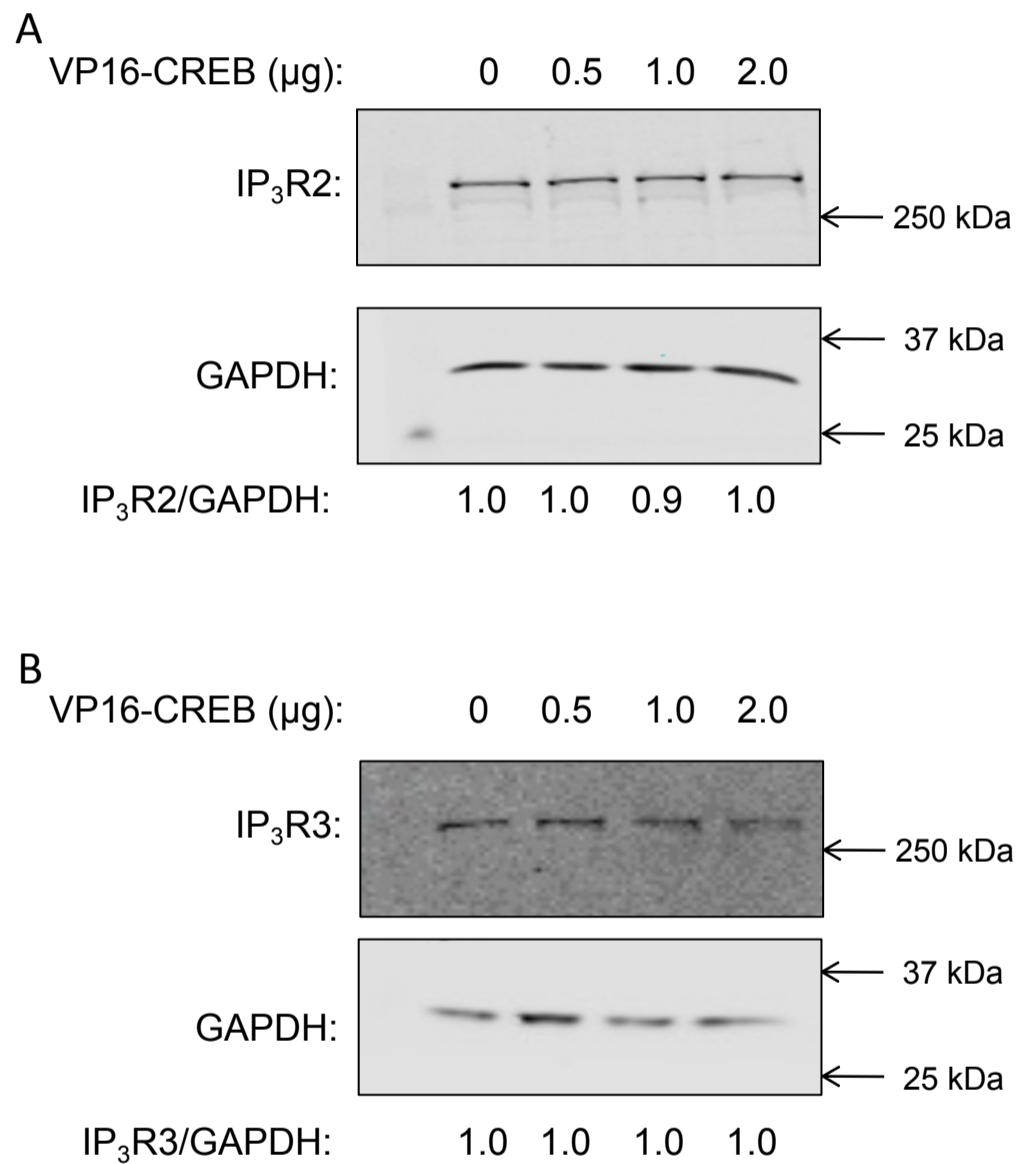

**Fig. S3. CREB over-expression does not alter the endogenous protein levels of IP<sub>3</sub>R2 and IP<sub>3</sub>R3.** HEK-293 cells were transiently transfected with increasing concentrations of VP16-CREB expression plasmid followed by Western blotting to determine the endogenous IP<sub>3</sub>R2 and IP<sub>3</sub>R3 protein levels using IP<sub>3</sub>R2 and IP<sub>3</sub>R3 specific antibodies. The endogenous (A) IP<sub>3</sub>R2 and (B) IP<sub>3</sub>R3 levels remained unchanged with increasing amounts of VP16-CREB expression plasmid.

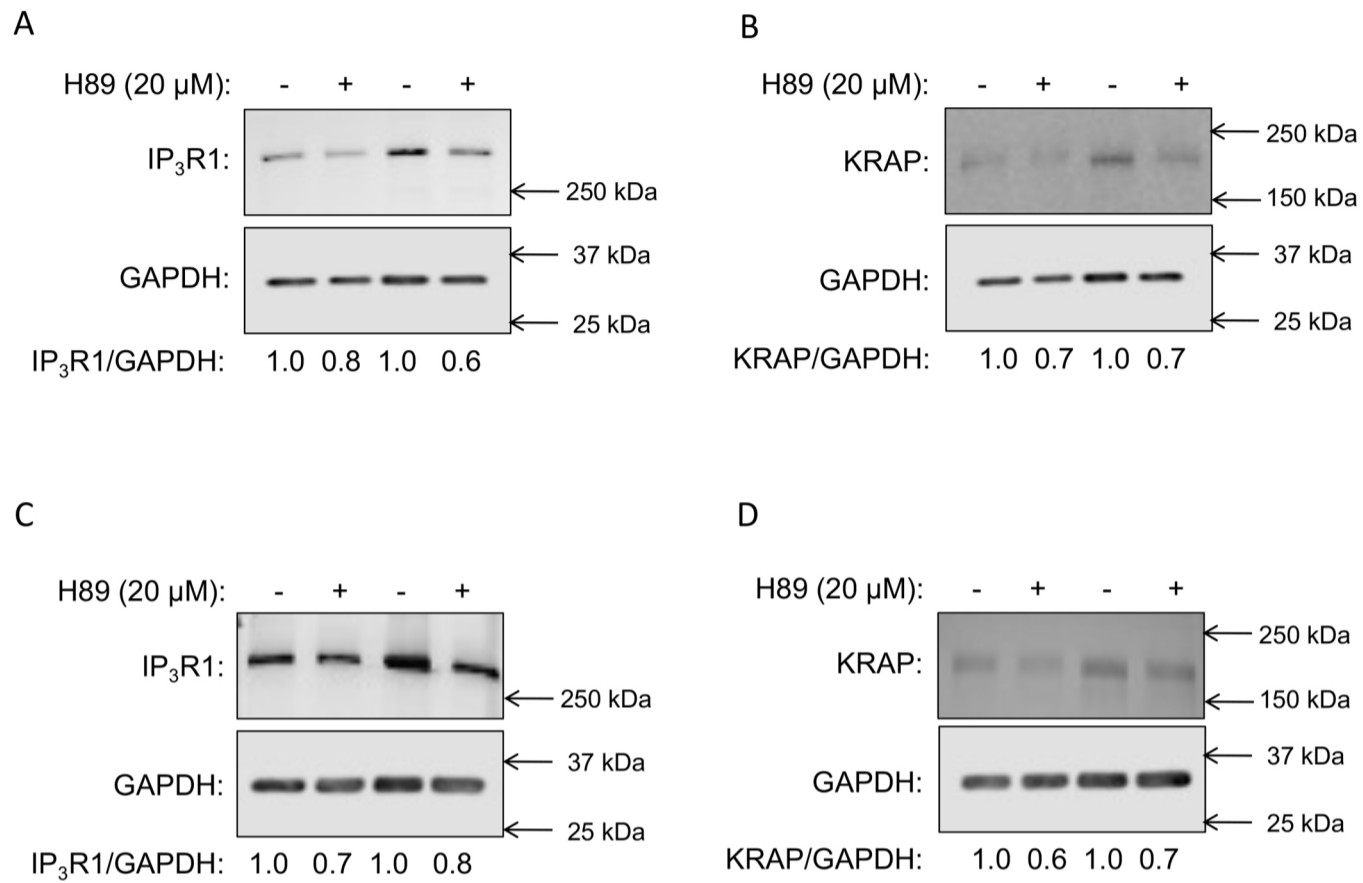

**Fig. S4. H89 diminished the endogenous IP<sub>3</sub>R1 and KRAP levels in SH-SY5Y and HeLa cells.** SH-SY5Y and HeLa cells were treated with 20  $\mu$ M H89 for 12 hours followed by protein isolation and Western blotting. Western blots depicting decrease in the endogenous IP<sub>3</sub>R1 and KRAP protein levels in (A, B) SH-SY5Y and (C, D) HeLa cells upon H89 treatment. (Lane numbers 1 & 2: 20  $\mu$ g protein and lane numbers 3 & 4: 30  $\mu$ g protein was loaded).

**Table S1.** Description of the nature of tissues, number of each tissue, TPMs for IP<sub>3</sub>R1/2/3 and CREB.

| No. | Tissue Sample                               | <i>CREB1</i><br>(TPM) | <i>ITPR1</i><br>(TPM) | <i>ITPR2</i><br>(TPM) | <i>ITPR3</i><br>(TPM) |
|-----|---------------------------------------------|-----------------------|-----------------------|-----------------------|-----------------------|
| 1.  | Adipose – Subcutaneous (n=663)              | 14.61                 | 13.4                  | 6.854                 | 32.57                 |
| 2.  | Adipose - Visceral (Omentum) (n=541)        | 11.72                 | 8.267                 | 7.814                 | 31.19                 |
| 3.  | Adrenal Gland (n=258)                       | 5.899                 | 11.95                 | 15.59                 | 18.4                  |
| 4.  | Artery – Aorta (n=432)                      | 14.46                 | 52.73                 | 6.018                 | 9.951                 |
| 5.  | Artery – Coronary (n=240)                   | 13.45                 | 59.83                 | 7.48                  | 23.03                 |
| 6.  | Artery - Tibial (n=663)                     | 15.68                 | 82.02                 | 6.701                 | 13.03                 |
| 7.  | Bladder (n=21)                              | 12.9                  | 28.67                 | 5.517                 | 25.74                 |
| 8.  | Brain – Amygdala (n=152)                    | 4.015                 | 4.2                   | 4.464                 | 2.842                 |
| 9.  | Brain - Anterior cingulate cortex (n=176)   | 4.413                 | 21.54                 | 4.466                 | 3.338                 |
| 10. | Brain - Caudate (basal ganglia) (n=246)     | 4.189                 | 14.34                 | 5.018                 | 3.643                 |
| 11. | Brain - Cerebellar Hemisphere (n=215)       | 14.01                 | 19.74                 | 2.093                 | 5.415                 |
| 12. | Brain – Cerebellum (n=241)                  | 10.66                 | 76.19                 | 3.348                 | 7.016                 |
| 13. | Brain – Cortex (n=255)                      | 4.516                 | 34.52                 | 5.34                  | 5.491                 |
| 14. | Brain - Frontal Cortex (n=209)              | 5.703                 | 38.23                 | 4.346                 | 3.828                 |
| 15. | Brain – Hippocampus (n=197)                 | 4.214                 | 5.737                 | 2.987                 | 3.149                 |
| 16. | Brain – Hypothalamus (n=202)                | 4.89                  | 4.515                 | 3.337                 | 4.013                 |
| 17. | Brain - Nucleus accumbens (n=246)           | 4.264                 | 13.04                 | 4.522                 | 3.837                 |
| 18. | Brain - Putamen (n=205)                     | 3.518                 | 7.7                   | 3.582                 | 3.324                 |
| 19. | Brain - Spinal cord (n=159)                 | 7.121                 | 2.611                 | 6.579                 | 7.828                 |
| 20. | Brain - Substantia nigra (n=139)            | 4.345                 | 4.135                 | 3.588                 | 4.662                 |
| 21. | Breast - Mammary Tissue (n=459)             | 13.35                 | 16.03                 | 9.494                 | 32.45                 |
| 22. | Cells - Cultured fibroblasts (n=504)        | 15.21                 | 4.17                  | 5.777                 | 46.68                 |
| 23. | Cells - EBV-transformed lymphocytes (n=174) | 20.64                 | 25.17                 | 29.77                 | 35.6                  |
| 24. | Cervix - Ectocervix (n=9)                   | 18.18                 | 18.34                 | 7.894                 | 37.12                 |
| 25. | Cervix - Endocervix (n=10)                  | 17.36                 | 18.44                 | 8.11                  | 37.35                 |
| 26. | Colon – Sigmoid (n=373)                     | 11.02                 | 24.68                 | 10.78                 | 23.53                 |

|     |                                               |       |       |       |       |
|-----|-----------------------------------------------|-------|-------|-------|-------|
| 27. | Colon – Transverse (n=406)                    | 8.59  | 11.21 | 5.755 | 43.48 |
| 28. | Esophagus - Gastroesophageal Junction (n=375) | 9.977 | 40.34 | 5.519 | 24.22 |
| 29. | Esophagus – Mucosa (n=555)                    | 9.181 | 5.766 | 10.06 | 31.55 |
| 30. | Esophagus - Muscularis (n=515)                | 9.75  | 41.08 | 6.212 | 22.67 |
| 31. | Fallopian Tube (n=9)                          | 14.04 | 47.75 | 8.022 | 38.19 |
| 32. | Heart - Atrial Appendage (n=426)              | 4.623 | 6.396 | 3.523 | 11.35 |
| 33. | Heart - Left Ventricle (n=432)                | 3.437 | 3.212 | 1.535 | 8.767 |
| 34. | Kidney – Cortex (n=85)                        | 3.749 | 7.076 | 4.516 | 12.99 |
| 35. | Kidney – Medulla (n=4)                        | 6.812 | 11.92 | 5.666 | 27.96 |
| 36. | Liver (n=226)                                 | 2.865 | 1.304 | 8.559 | 1.829 |
| 37. | Lung (n=578)                                  | 13.63 | 20.26 | 7.498 | 72.36 |
| 38. | Minor Salivary Gland (n=162)                  | 10.29 | 12.66 | 15.54 | 33.66 |
| 39. | Muscle – Skeletal (n=803)                     | 3.132 | 1.61  | 1.39  | 3.889 |
| 40. | Nerve - Tibial (n=619)                        | 15.74 | 12.7  | 8.456 | 135.8 |
| 41. | Ovary (n=180)                                 | 14.77 | 39.94 | 8.747 | 31.99 |
| 42. | Pancreas (n=328)                              | 3.604 | 1.445 | 3.459 | 9.256 |
| 43. | Pituitary (n=283)                             | 8.498 | 18.77 | 4.27  | 17.13 |
| 44. | Prostate (n=245)                              | 11.26 | 20.87 | 5.242 | 33.15 |
| 45. | Skin - Not Sun Exposed (n=604)                | 11.32 | 3.817 | 13.62 | 107.1 |
| 46. | Skin - Sun Exposed (n=701)                    | 11.21 | 5.94  | 14.71 | 105.5 |
| 47. | Small Intestine - Terminal Ileum (n=187)      | 10.8  | 13.55 | 6.769 | 64.36 |
| 48. | Spleen (n=241)                                | 12.43 | 10.26 | 5.88  | 74.89 |
| 49. | Stomach (n=359)                               | 6.33  | 6.782 | 4.091 | 36.49 |
| 50. | Testis (n=361)                                | 17.57 | 6.888 | 3.91  | 44.57 |
| 51. | Thyroid (n=653)                               | 13.48 | 34.69 | 6.175 | 133.3 |
| 52. | Uterus (n=142)                                | 15.93 | 46.98 | 7.428 | 26.56 |
| 53. | Vagina (n=156)                                | 13.84 | 12.97 | 8.965 | 56.42 |
| 54. | Whole Blood (n=755)                           | 5.615 | 1.484 | 2.169 | 4.378 |

**Table S2.** *In silico* analysis revealed putative binding sites for CREB in the proximal promoter domains of KRAP gene.

| Tool | Alibaba2.1 | TFBIND | ConSite | PROMO |
|------|------------|--------|---------|-------|
|      | CREB       | CREB   | CREB    | CREB  |
| KRAP | -          | +      | +       | -     |

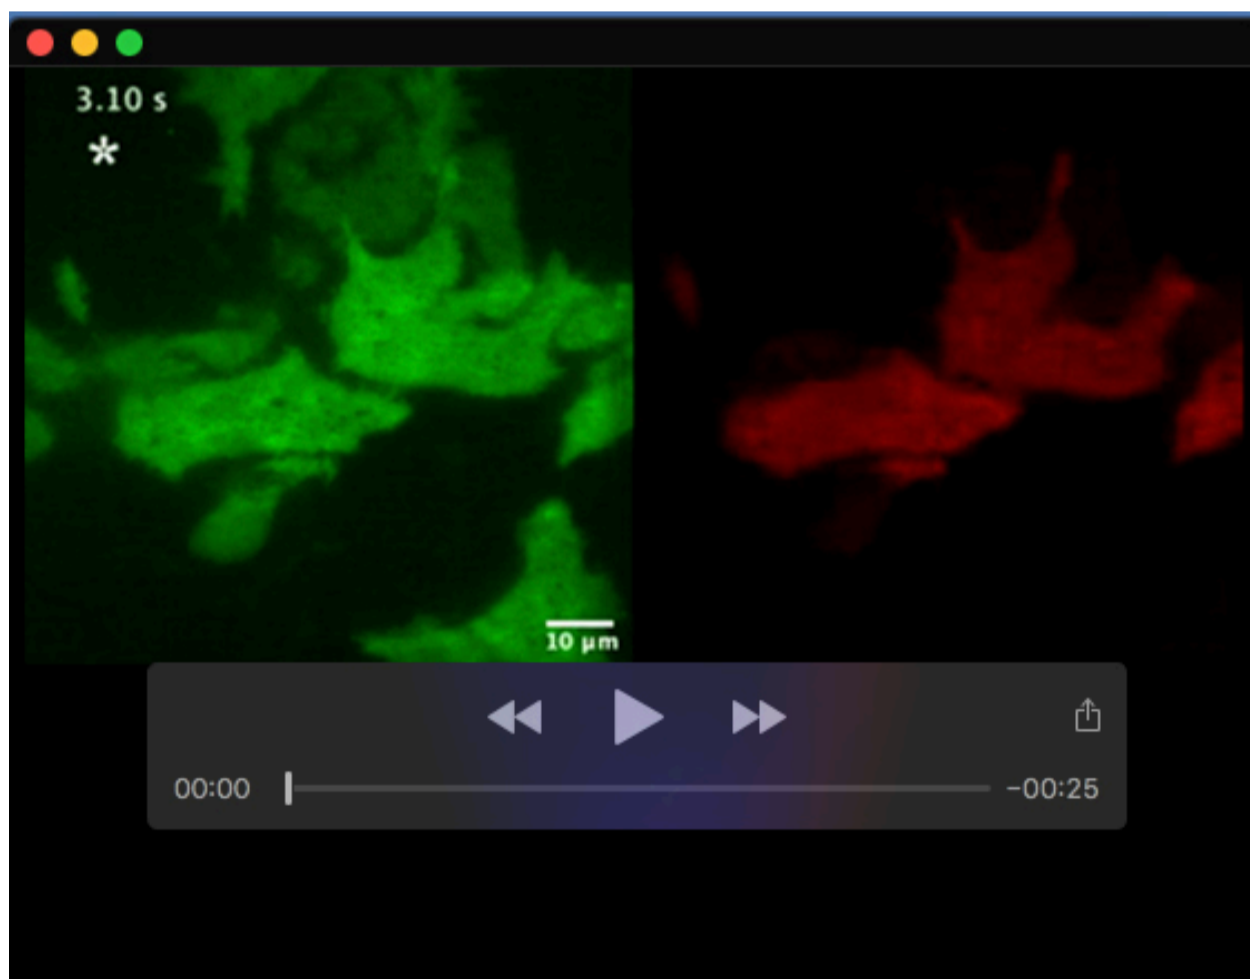

**Movie 1.** A typical TIRF recording from hR1 endo cells co-transfected with pcDNA and mCherry plasmid. Video showing 3 s prior to photolysis of caged cilP<sub>3</sub> and the following 40 s of activity in Cal520-loaded hR1 endo cells, related to Fig. 7. Photolysis was accomplished by exposure from a 405 nm laser for 1 s (indicated by an asterisk). An image acquired from the same field of view using a 561 nm laser to optically identify mCherry positive cells is also shown.

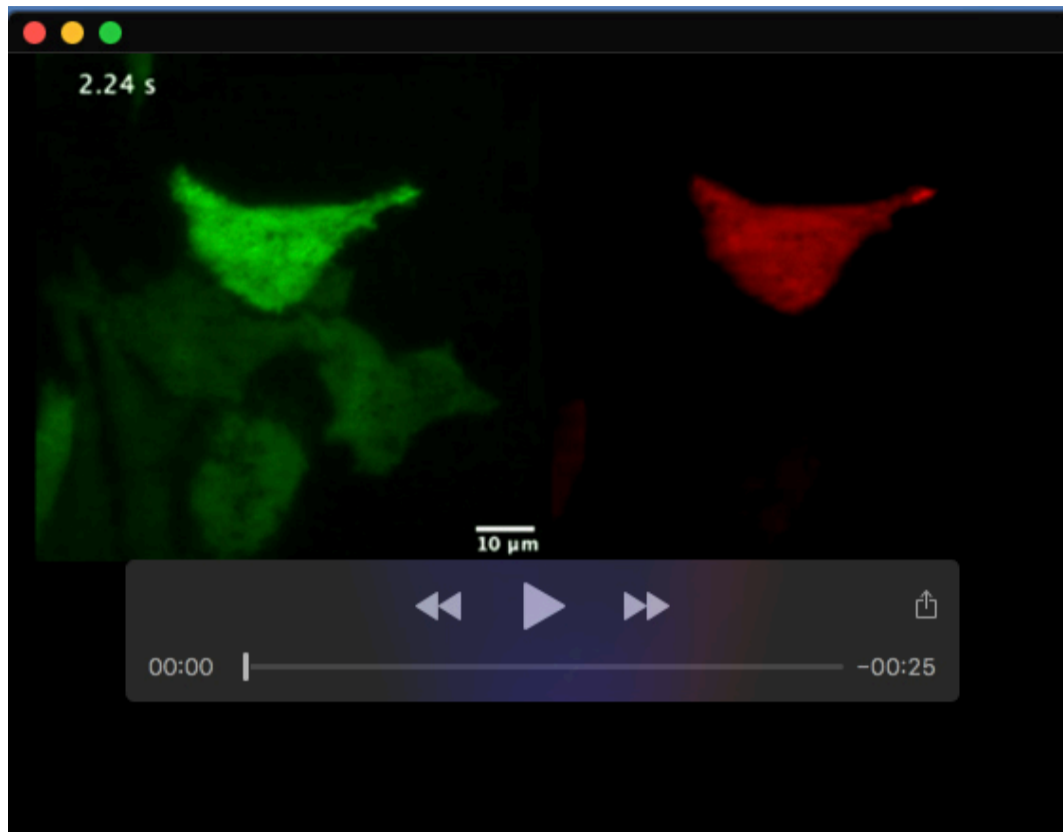

**Movie 2.** A typical TIRF recording from hR1 endo cells co-transfected with KCREB and mCherry plasmid. Video showing 3 s prior to photolysis of caged cilP<sub>3</sub> and the following 40 s of activity in Cal520-loaded hR1 endo cells, related to Fig. 7. Photolysis was accomplished by exposure from a 405 nm laser for 1 s (indicated by an asterisk). An image acquired from the same field of view using a 561 nm laser to optically identify mCherry positive cells is also shown.

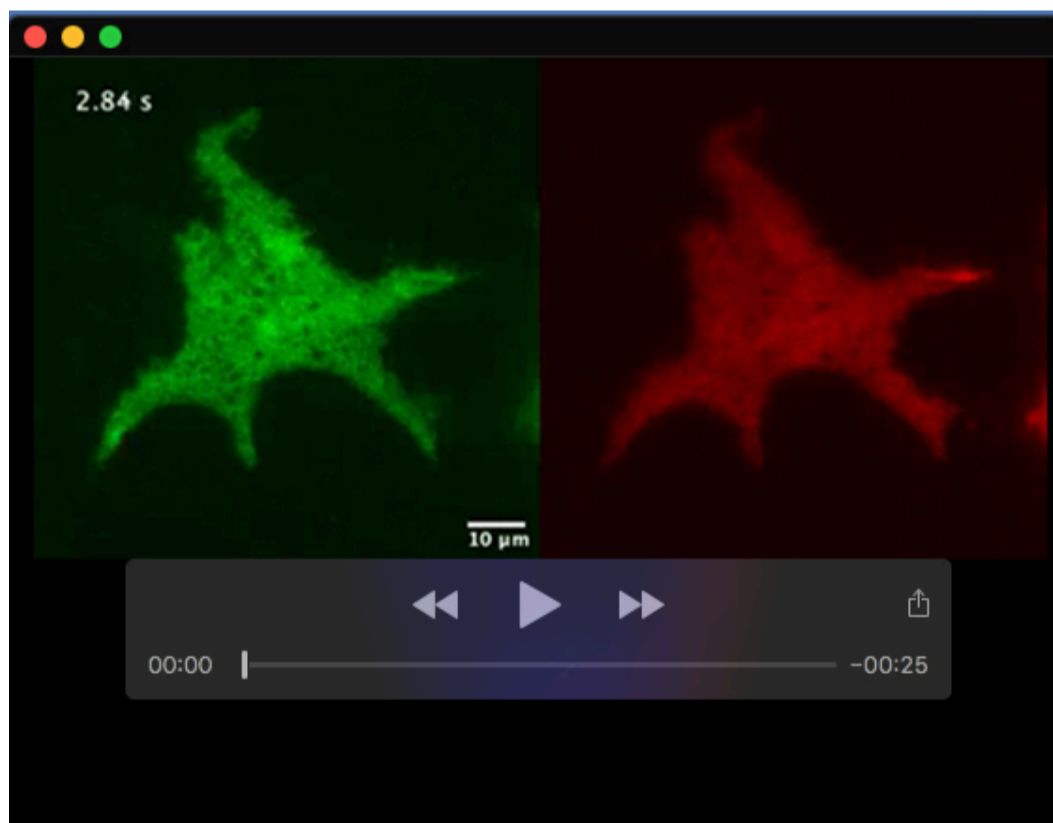

**Movie 3.** A typical TIRF recording from hR1 endo cells co-transfected with VP16-CREB and mCherry plasmid. Video showing 3 s prior to photolysis of caged cilP<sub>3</sub> and the following 40 s of activity in Cal520-loaded hR1 endo cells, related to Fig. 7. Photolysis was accomplished by exposure from a 405 nm laser for 1 s (indicated by an asterisk). An image acquired from the same field of view using a 561 nm laser to optically identify mCherry positive cells is also shown.
